# Supplementary material for: Tuning electronic and magnetic properties of MoO3 sheets by cutting, hydrogenation, and external strain: a computational investigation
Source: Royal Society of Chemistry journal article supplement (doi:10.1039/c3nr33009e), 2013-01-01
Supplement: c3nr33009e.pdf [file c3nr33009e.pdf]

Supporting Information

**Tuning Electronic and Magnetic Properties of MoO<sub>3</sub> Sheets by  
Cutting, Hydrogenation, and External Strain: A Computational  
Investigation**

Fengyu Li,<sup>†</sup> Zhongfang Chen<sup>†,\*</sup>

Department of Physics, Department of Chemistry, Institute for Functional  
Nanomaterials, University of Puerto Rico, Rio Piedras Campus, San Juan, PR 00931.

\* To whom correspondence should be addressed. Email: [zhongfangchen@gmail.com](mailto:zhongfangchen@gmail.com)

(Z.C.)

<sup>†</sup> University of Puerto Rico

To test the effectiveness of this method, we presented the optimized structure of bulk MoO<sub>3</sub> based on PBE and PBE-D2 approaches, respectively (shown in Figure S1). The PBE yields the two interlayer O-O distances between adjacent layers of 3.335 and 2.855 Å, whereas PBE-D2 predicts the corresponding O-O distances of 3.212 and 2.792 Å, which are more comparable with the experimental values of 3.240 and 2.823 Å. [Kihlberg, L. *Ark. Kemi* **1963**, *21*, 357] The intralayer Mo-O bond lengths within a corrugated plane obtained using PBE and PBE-D2 are similar. Thus PBE-D2 is quantitatively better than PBE when dealing with the weak-bonded layer system.

**Table S1.** The plane-wave cut off energy test results based on bulk MoO<sub>3</sub>, the k-point mesh was chosen as 8 × 6 × 8.

| Cut off (eV) | Spin-nonpolarized energy (eV) | Spin polarized energy (eV) | Magnetization (μ <sub>B</sub> ) |
|--------------|-------------------------------|----------------------------|---------------------------------|
| 360          | -132.031                      | -132.031                   | 0.0003                          |
| 400          | -132.864                      | -132.864                   | 0.0003                          |
| 450          | -132.617                      | -132.617                   | 0.0003                          |
| 500          | -132.647                      | -132.647                   | 0.0000                          |
| 550          | -132.640                      | -132.640                   | 0.0000                          |
| 600          | -132.661                      | -132.661                   | 0.0000                          |

From Table 1, we see that the spin polarized magnetic moment are invariable with different energy cut off, and the energy difference between 500 eV and higher cut-off is less than 0.1 eV, so we choose the cut-off (500 eV) as our computation parameter.

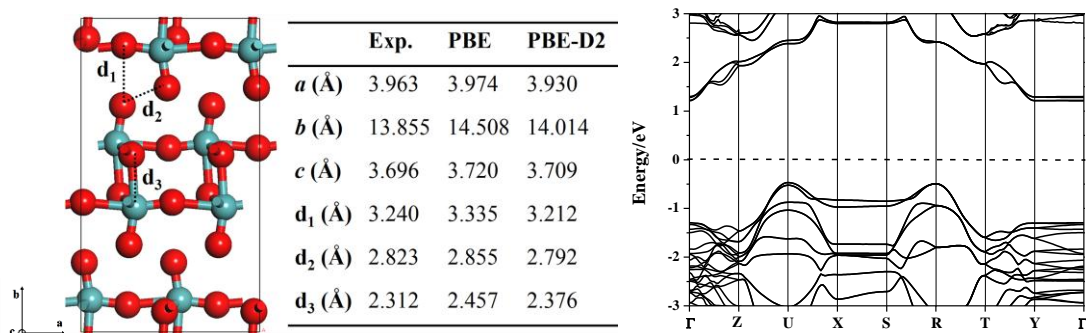

**Figure S1.** The optimized geometry of bulk  $\text{MoO}_3$  based on PBE and PBE-D2, and the band structure from PBE-D2 calculation. The labeled bond length of  $d_1$  and  $d_2$  are the O-O distances between two adjacent layers,  $d_3$  is the Mo-O distance in the same layer along  $b$ -axis. The cyan and red atoms represent Mo and O atoms, respectively. The experimental data were taken from [Kihlborg, L. *Ark. Kemi* **1963**, *21*, 357]. The bands are plotted along a path connecting high-symmetry points in the irreducible Brillouin zone. The Fermi energy is denoted by a dashed line. The direct band gap is 2.75 eV at gamma point, better than the reported PBE result (2.23 eV), [Sayede, A. D.; Amriou, T.; Pernisek, M.; Khelifa, B.; Mathieu, C. *Chem. Phys.* **2005**, *316*, 72] but slightly lower than the experimental measurement (3.3 eV). [Bouzidi, A.; Benramdane, N.; Tabet-Derranz, H.; Mathieu, C.; Khelifa, B.; Desfeux, R. *Mater. Sci. Eng. B* **2003**, *97*, 5]

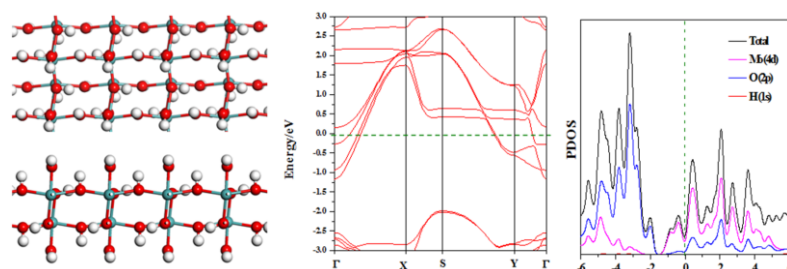

**Figure S2.** Top and side view of the fully hydrogenated MoO<sub>3</sub> monolayer as well as its band structure and projected density of state with spin-up channel.

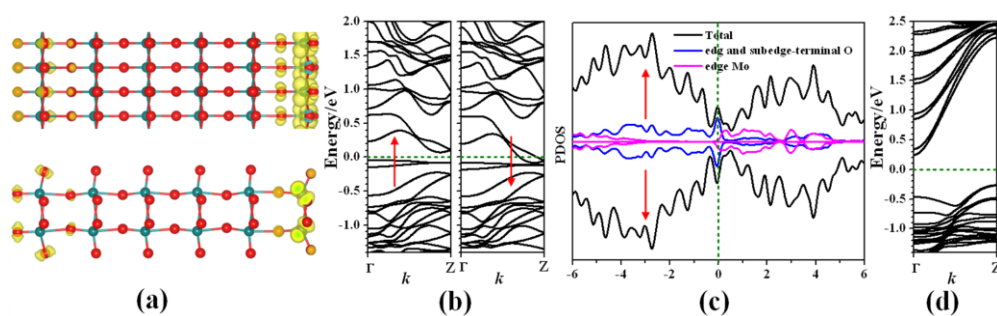

**Figure S3.** Top and side view of the spatial spin density distribution (a), band structure (b), partial density of states (c) for the second type of 12-c-II MoO<sub>3</sub> monolayer nanoribbon, and band structure of 12-c-II MoO<sub>3</sub> monolayer nanoribbon with edge hydrogenated (d).

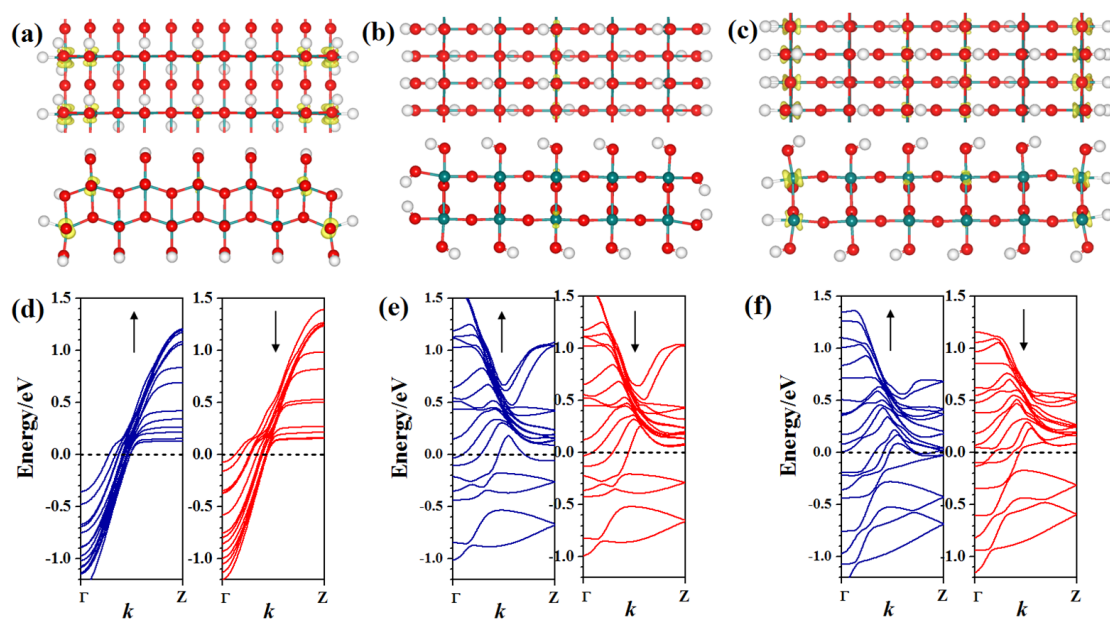

**Figure S4.** Spatial spin density distribution of *a-11* (a), *c-11-I* (b) and *c-11-II* (c) nanoribbons where both surface and edge atoms are saturated by H atoms, as well as the corresponding band structures (d), (e) and (f).

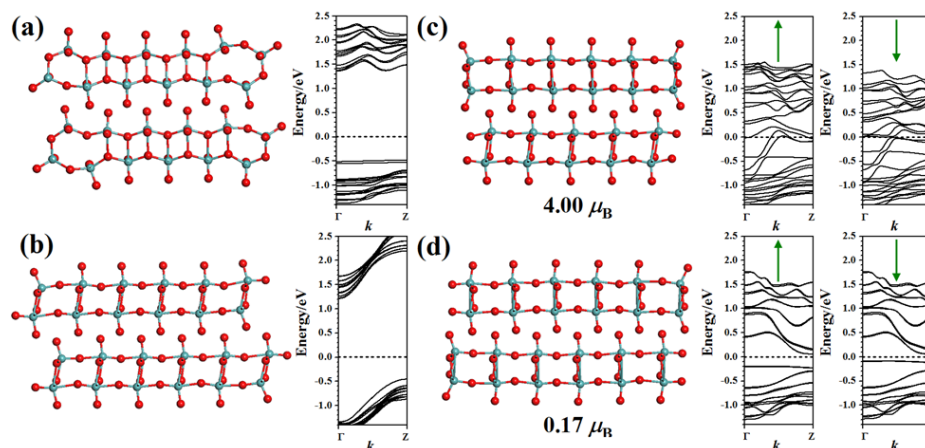

**Figure S5.** Optimized *a-12* (a), two types of *c-12* (b, d) and *c-11-I* and *c-11-II* combined (c)  $\text{MoO}_3$  double-layer nanoribbons, as well as their corresponding band structures.

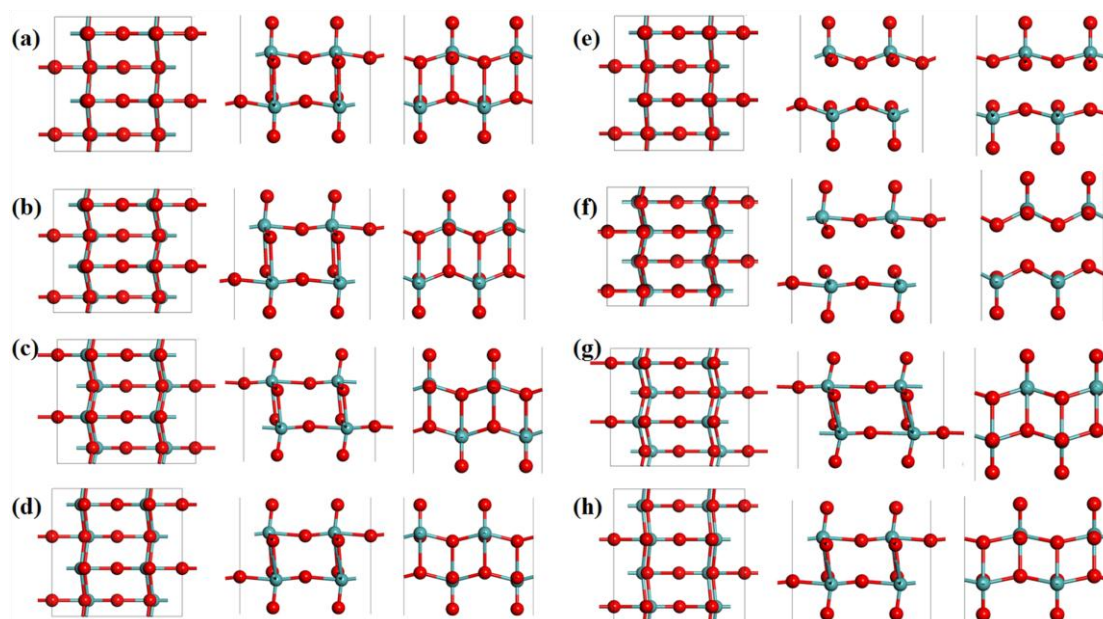

**Figure S6.** Top (left) and side (right) views of 2D single layer MoO<sub>3</sub> geometries (2×1×2 supercell) with *c*-axis condensed by 5% (a) and 10% (e), stretched by 5% (c) and 10% (g), respectively; with *a*-axis condensed by 5% (b) and 10% (f), stretched by 5% (d) and 10% (h), respectively.

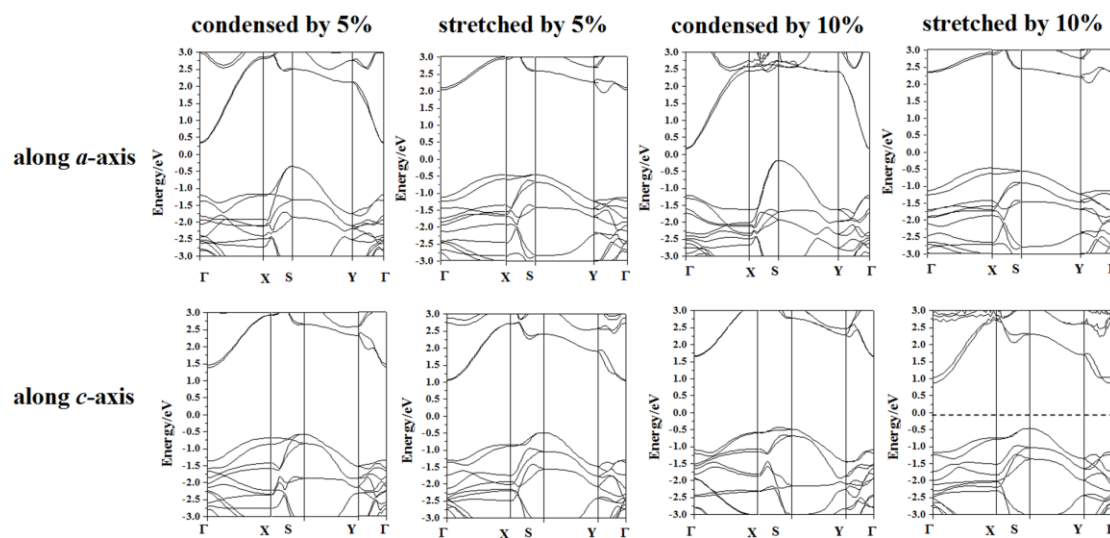

**Figure S7.** Band structures of MoO<sub>3</sub> monolayer with *a*-axis (upper panel) and *c*-axis (lower panel) condensed and stretched by 5% and 10%, respectively.

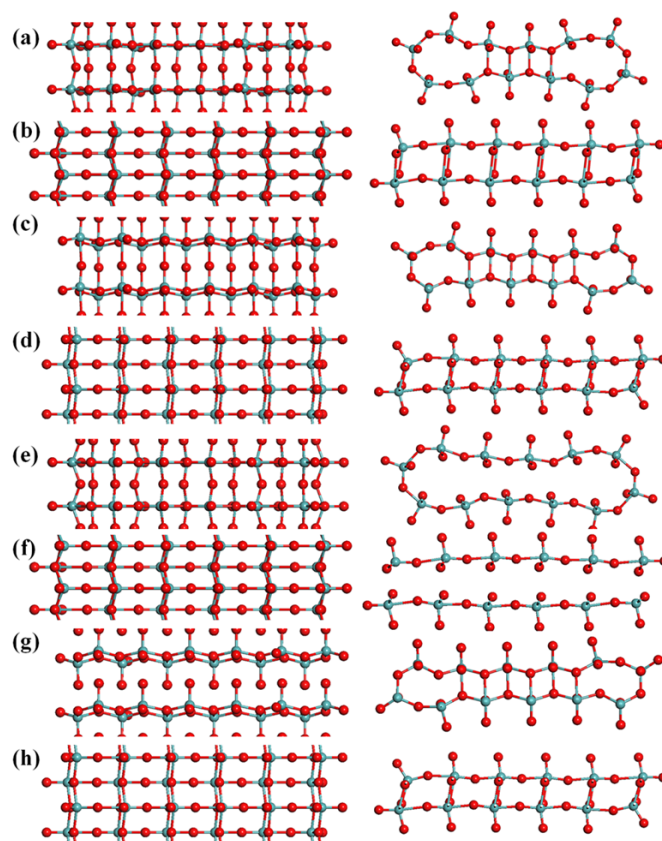

**Figure S8.** Top (left) and side (right) views of 1D single-layer  $\text{MoO}_3$  *a*-12 nanoribbon condensed by 5% (a) and 10% (e), stretched by 5% (c) and 10% (g) along *a*-axis, respectively; *c*-12 NR condensed by 5% (b) and 10% (f), stretched by 5% (d) and 10% (h) along *c*-axis, respectively.



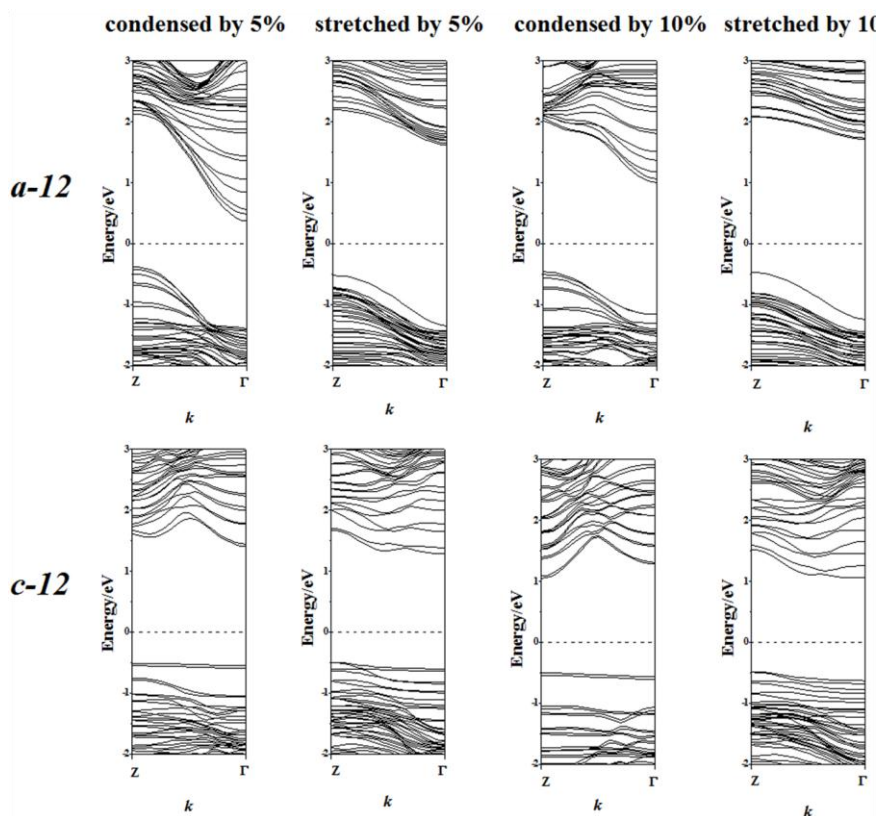

**Figure S9.** Band structures of *a-12* (upper panel) and *c-12* (lower panel) MoO<sub>3</sub> single-layer nanoribbons with *c*-axis and *a*-axis condensed and stretched by 5% and 10%, respectively.
